# Supplementary material for: Metal organic framework (MOF) micro/nanopillars
Source: Royal Society of Chemistry journal article supplement (doi:10.1039/c4ce00172a), 2014-01-01
Supplement: c4ce00172a2.pdf [file c4ce00172a2.pdf]

### X-ray Structure Determination of Compound ZnADC

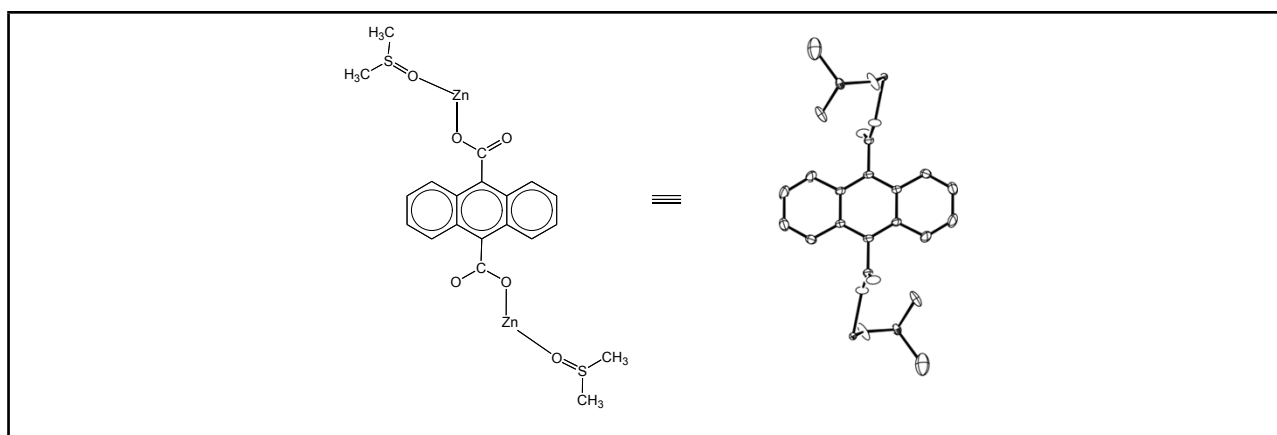

Compound ZnADC, C<sub>19</sub>H<sub>17</sub>SO<sub>5</sub>Zn, crystallizes in the orthorhombic space group Pnma (systematic absences hk0: =odd and 0kl: k+l=odd) with a=7.3053(7)Å, b=17.5056(14)Å, c=12.6731(12)Å, V=1620.7(3)Å<sup>3</sup>, Z=4, and d<sub>calc</sub>=1.733 g/cm<sup>3</sup>. X-ray intensity data were collected on a Bruker APEXII CCD area detector employing graphite-monochromated Mo-K $\alpha$  radiation ( $\lambda$ =0.71073 Å) at a temperature of 143(1)K. Preliminary indexing was performed from a series of thirty-six 0.5° rotation frames with exposures of 10 seconds. A total of 1492 frames were collected with a crystal to detector distance of 37.6 mm, rotation widths of 0.5° and exposures of 30 seconds:

| scan type | 2 $\theta$ | $\omega$ | $\phi$ | $\chi$ | frames |
|-----------|------------|----------|--------|--------|--------|
| $\phi$    | -23.00     | 325.83   | 12.48  | 28.88  | 739    |
| $\phi$    | -15.50     | 258.48   | 47.74  | 19.46  | 488    |
| $\omega$  | -8.00      | 320.62   | 277.32 | 84.71  | 68     |
| $\omega$  | -10.50     | 306.95   | 272.07 | 99.72  | 80     |
| $\omega$  | 17.00      | 321.08   | 318.36 | 83.36  | 117    |

Rotation frames were integrated using SAINT<sup>i</sup>, producing a listing of unaveraged F<sup>2</sup> and  $\sigma$ (F<sup>2</sup>) values which were then passed to the SHELXTL<sup>ii</sup> program package for further processing and structure solution. A total of 22496 reflections were measured over the ranges  $1.98 \leq \theta \leq 27.53^\circ$ ,  $-9 \leq h \leq 9$ ,  $-22 \leq k \leq 22$ ,  $-15 \leq l \leq 16$  yielding 1929 unique reflections (Rint = 0.0557). The intensity data were corrected for Lorentz and polarization effects and for absorption using SADABS<sup>iii</sup> (minimum and maximum transmission 0.6511, 0.7456).

The structure was solved by direct methods (SHELXS-97<sup>iv</sup>). Refinement was by full-matrix least

squares based on  $F^2$  using SHELXL-97.<sup>v</sup> All reflections were used during refinement. The weighting scheme used was  $w=1/[\sigma^2(F_o^2) + (0.0485P)^2 + 1.6449P]$  where  $P = (F_o^2 + 2F_c^2)/3$ . Non-hydrogen atoms were refined anisotropically and hydrogen atoms were placed in idealized positions and were not refined. Refinement converged to  $R1=0.0366$  and  $wR2=0.0894$  for 1413 observed reflections for which  $F > 4\sigma(F)$  and  $R1=0.0578$  and  $wR2=0.0996$  and  $GOF = 1.090$  for all 1929 unique, non-zero reflections and 128 variables.<sup>vi</sup> The maximum  $\Delta/\sigma$  in the final cycle of least squares was 0.000 and the two most prominent peaks in the final difference Fourier were  $+0.970$  and  $-0.660 \text{ e}/\text{\AA}^3$ .

Table 1. lists cell information, data collection parameters, and refinement data. Final positional and equivalent isotropic thermal parameters are given in Tables 2. and 3. Anisotropic thermal parameters are in Table 4. Tables 5. and 6. list bond distances and bond angles. Figure 1. is an ORTEP<sup>vii</sup> representation of the molecule with 30% probability thermal ellipsoids displayed.

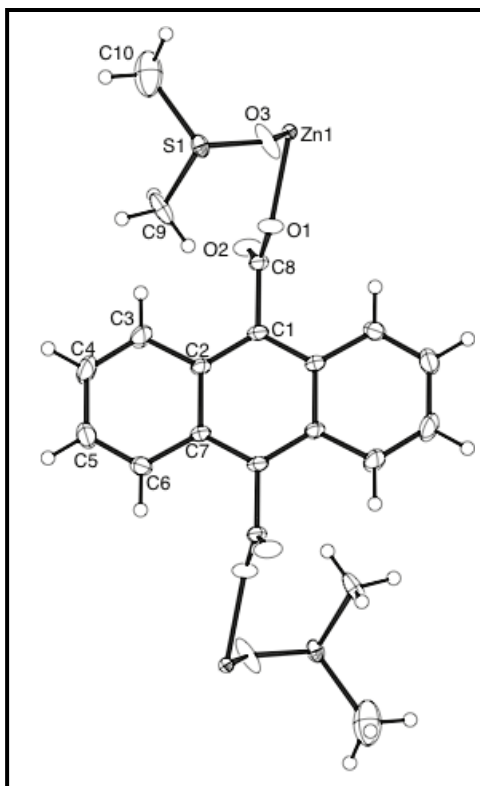

Figure 1. ORTEP drawing of the title compound with 30% probability thermal ellipsoids.

**Table 1. Summary of Structure Determination of Compound 99210**

|                                   |                                                    |
|-----------------------------------|----------------------------------------------------|
| Empirical formula                 | C <sub>19</sub> H <sub>17</sub> SO <sub>5</sub> Zn |
| Formula weight                    | 422.76                                             |
| Temperature                       | 143(1) K                                           |
| Wavelength                        | 0.71073 Å                                          |
| Crystal system                    | orthorhombic                                       |
| Space group                       | Pnma                                               |
| Cell constants:                   |                                                    |
| a                                 | 7.3053(7) Å                                        |
| b                                 | 17.5056(14) Å                                      |
| c                                 | 12.6731(12) Å                                      |
| Volume                            | 1620.7(3) Å <sup>3</sup>                           |
| Z                                 | 4                                                  |
| Density (calculated)              | 1.733 Mg/m <sup>3</sup>                            |
| Absorption coefficient            | 1.674 mm <sup>-1</sup>                             |
| F(000)                            | 868                                                |
| Crystal size                      | 0.25 x 0.02 x 0.01 mm <sup>3</sup>                 |
| Theta range for data collection   | 1.98 to 27.53°                                     |
| Index ranges                      | -9 ≤ h ≤ 9, -22 ≤ k ≤ 22, -15 ≤ l ≤ 16             |
| Reflections collected             | 22496                                              |
| Independent reflections           | 1929 [R(int) = 0.0557]                             |
| Completeness to theta = 27.53°    | 99.9 %                                             |
| Absorption correction             | Semi-empirical from equivalents                    |
| Max. and min. transmission        | 0.7456 and 0.6511                                  |
| Refinement method                 | Full-matrix least-squares on F <sup>2</sup>        |
| Data / restraints / parameters    | 1929 / 108 / 128                                   |
| Goodness-of-fit on F <sup>2</sup> | 1.090                                              |
| Final R indices [I > 2σ(I)]       | R1 = 0.0366, wR2 = 0.0894                          |
| R indices (all data)              | R1 = 0.0578, wR2 = 0.0996                          |
| Largest diff. peak and hole       | 0.970 and -0.660 e.Å <sup>-3</sup>                 |

**Table 2. Refined Positional Parameters for Compound 99210**

| Atom | x          | y           | z           | $U_{eq}, \text{\AA}^2$ |
|------|------------|-------------|-------------|------------------------|
| Zn1  | 0.24380(6) | 0.2500      | 0.74642(4)  | 0.01113(15)            |
| S1   | -0.0501(2) | 0.28725(9)  | 0.54161(12) | 0.0182(3)              |
| O1   | 0.3440(3)  | 0.16631(12) | 0.64993(17) | 0.0258(5)              |
| O2   | 0.6508(3)  | 0.16382(12) | 0.65647(18) | 0.0276(5)              |
| O3   | -0.0086(4) | 0.2500      | 0.6548(2)   | 0.0329(8)              |
| C1   | 0.4975(4)  | 0.06727(17) | 0.5613(2)   | 0.0165(6)              |
| C2   | 0.5591(5)  | 0.06963(16) | 0.4567(2)   | 0.0177(6)              |
| C3   | 0.6182(7)  | 0.13911(19) | 0.4079(3)   | 0.0390(10)             |
| C4   | 0.6778(7)  | 0.1404(2)   | 0.3073(3)   | 0.0434(11)             |
| C5   | 0.6851(6)  | 0.0730(2)   | 0.2467(3)   | 0.0290(7)              |
| C6   | 0.6303(5)  | 0.00628(18) | 0.2885(2)   | 0.0204(6)              |
| C7   | 0.5647(4)  | 0.00120(16) | 0.3944(2)   | 0.0142(6)              |
| C8   | 0.4978(5)  | 0.13890(17) | 0.6287(2)   | 0.0197(6)              |
| C9   | 0.1315(7)  | 0.2500      | 0.4613(4)   | 0.0345(12)             |
| C10  | -0.0013(6) | 0.3948(3)   | 0.5415(4)   | 0.0579(12)             |

$U_{eq} = \frac{1}{3}[U_{11}(aa^*)^2 + U_{22}(bb^*)^2 + U_{33}(cc^*)^2 + 2U_{12}aa^*bb^*\cos\gamma + 2U_{13}aa^*cc^*\cos\beta + 2U_{23}bb^*cc^*\cos\alpha]$

**Table 3. Positional Parameters for Hydrogens in Compound 99210**

| Atom | x       | y       | z      | $U_{iso}, \text{\AA}^2$ |
|------|---------|---------|--------|-------------------------|
| H3   | 0.6170  | 0.1841  | 0.4478 | 0.038                   |
| H4   | 0.7154  | 0.1869  | 0.2771 | 0.038                   |
| H5   | 0.7280  | 0.0749  | 0.1766 | 0.038                   |
| H6   | 0.6348  | -0.0383 | 0.2473 | 0.038                   |
| H9a  | 0.2475  | 0.2704  | 0.4855 | 0.038                   |
| H9b  | 0.1137  | 0.2644  | 0.3891 | 0.038                   |
| H9c  | 0.1353  | 0.1953  | 0.4668 | 0.038                   |
| H10a | -0.0863 | 0.4234  | 0.5884 | 0.038                   |
| H10b | -0.0102 | 0.4184  | 0.4730 | 0.038                   |
| H10c | 0.1220  | 0.4071  | 0.5692 | 0.038                   |

**Table 4. Refined Thermal Parameters (U's) for Compound 99210**

| Atom | $U_{11}$   | $U_{22}$   | $U_{33}$   | $U_{23}$    | $U_{13}$    | $U_{12}$    |
|------|------------|------------|------------|-------------|-------------|-------------|
| Zn1  | 0.0120(2)  | 0.0101(2)  | 0.0113(2)  | 0.000       | 0.00125(19) | 0.000       |
| S1   | 0.0178(7)  | 0.0248(7)  | 0.0119(6)  | 0.0018(6)   | -0.0025(6)  | -0.0002(6)  |
| O1   | 0.0371(13) | 0.0169(11) | 0.0235(11) | -0.0083(9)  | 0.0008(10)  | 0.0056(10)  |
| O2   | 0.0370(14) | 0.0187(11) | 0.0271(12) | -0.0112(10) | -0.0080(11) | -0.0005(10) |
| O3   | 0.0148(16) | 0.075(3)   | 0.0091(14) | 0.000       | 0.0000(12)  | 0.000       |
| C1   | 0.0197(14) | 0.0115(12) | 0.0182(13) | -0.0042(11) | -0.0015(12) | 0.0014(11)  |
| C2   | 0.0245(15) | 0.0118(13) | 0.0170(13) | -0.0029(11) | -0.0019(12) | -0.0028(12) |
| C3   | 0.078(3)   | 0.0165(16) | 0.0228(16) | -0.0032(13) | 0.0020(18)  | -0.0182(18) |
| C4   | 0.079(3)   | 0.0226(18) | 0.0282(18) | 0.0046(14)  | 0.0044(19)  | -0.0235(19) |
| C5   | 0.0368(18) | 0.0316(17) | 0.0187(15) | 0.0020(13)  | 0.0056(15)  | -0.0063(16) |
| C6   | 0.0232(16) | 0.0201(15) | 0.0178(14) | -0.0037(12) | 0.0005(13)  | 0.0023(13)  |
| C7   | 0.0142(13) | 0.0116(13) | 0.0167(13) | -0.0023(11) | -0.0023(11) | 0.0005(11)  |

|     |            |            |            |             |             |            |
|-----|------------|------------|------------|-------------|-------------|------------|
| C8  | 0.0331(16) | 0.0121(13) | 0.0140(13) | -0.0018(11) | -0.0011(13) | 0.0022(13) |
| C9  | 0.034(3)   | 0.058(3)   | 0.011(2)   | 0.000       | 0.004(2)    | 0.000      |
| C10 | 0.038(2)   | 0.081(3)   | 0.055(3)   | 0.032(2)    | 0.001(2)    | 0.009(2)   |

The form of the anisotropic displacement parameter is:

$$\exp[-2\pi^2(a^2U_{11}h^2+b^2U_{22}k^2+c^2U_{33}l^2+2b^*c^*U_{23}kl+2a^*c^*U_{13}hl+2a^*b^*U_{12}hk)]$$

**Table 5. Bond Distances in Compound 99210, Å**

|          |          |          |          |          |          |
|----------|----------|----------|----------|----------|----------|
| Zn1-O1   | 2.044(2) | Zn1-O1#1 | 2.044(2) | Zn1-O2#2 | 2.062(2) |
| Zn1-O2#3 | 2.062(2) | Zn1-O3   | 2.179(3) | Zn1-O3#4 | 2.200(3) |
| S1-S1#1  | 1.304(3) | S1-O3    | 1.605(3) | S1-C9    | 1.795(5) |
| S1-C10   | 1.916(5) | O1-C8    | 1.251(4) | O2-C8    | 1.250(4) |
| O2-Zn1#4 | 2.062(2) | O3-S1#1  | 1.605(3) | O3-Zn1#2 | 2.200(3) |
| C1-C7#5  | 1.399(4) | C1-C2    | 1.401(4) | C1-C8    | 1.517(4) |
| C2-C3    | 1.431(4) | C2-C7    | 1.435(4) | C3-C4    | 1.347(5) |
| C4-C5    | 1.408(5) | C5-C6    | 1.344(5) | C6-C7    | 1.428(4) |
| C7-C1#5  | 1.399(4) | C9-S1#1  | 1.795(5) |          |          |

**Table 6. Bond Angles in Compound 99210, °**

|               |            |               |            |               |            |
|---------------|------------|---------------|------------|---------------|------------|
| O1-Zn1-O1#1   | 91.58(13)  | O1-Zn1-O2#2   | 178.15(10) | O1#1-Zn1-O2#2 | 87.17(9)   |
| O1-Zn1-O2#3   | 87.17(9)   | O1#1-Zn1-O2#3 | 178.15(10) | O2#2-Zn1-O2#3 | 94.04(13)  |
| O1-Zn1-O3     | 89.10(9)   | O1#1-Zn1-O3   | 89.10(9)   | O2#2-Zn1-O3   | 92.24(9)   |
| O2#3-Zn1-O3   | 92.24(9)   | O1-Zn1-O3#4   | 92.62(9)   | O1#1-Zn1-O3#4 | 92.62(9)   |
| O2#2-Zn1-O3#4 | 86.07(9)   | O2#3-Zn1-O3#4 | 86.07(9)   | O3-Zn1-O3#4   | 177.52(9)  |
| S1#1-S1-O3    | 66.03(7)   | S1#1-S1-C9    | 68.69(7)   | O3-S1-C9      | 102.66(18) |
| S1#1-S1-C10   | 169.26(14) | O3-S1-C10     | 111.39(18) | C9-S1-C10     | 102.64(17) |
| C8-O1-Zn1     | 136.5(2)   | C8-O2-Zn1#4   | 135.9(2)   | S1#1-O3-S1    | 47.95(14)  |
| S1#1-O3-Zn1   | 129.53(17) | S1-O3-Zn1     | 129.53(17) | S1#1-O3-Zn1#2 | 110.67(16) |
| S1-O3-Zn1#2   | 110.67(16) | Zn1-O3-Zn1#2  | 113.13(13) | C7#5-C1-C2    | 120.6(3)   |
| C7#5-C1-C8    | 118.9(3)   | C2-C1-C8      | 120.5(3)   | C1-C2-C3      | 122.1(3)   |
| C1-C2-C7      | 120.3(3)   | C3-C2-C7      | 117.6(3)   | C4-C3-C2      | 121.3(3)   |
| C3-C4-C5      | 121.0(3)   | C6-C5-C4      | 120.1(3)   | C5-C6-C7      | 121.6(3)   |
| C1#5-C7-C6    | 122.6(3)   | C1#5-C7-C2    | 119.0(3)   | C6-C7-C2      | 118.3(3)   |
| O2-C8-O1      | 127.5(3)   | O2-C8-C1      | 116.6(3)   | O1-C8-C1      | 115.9(3)   |
| S1#1-C9-S1    | 42.61(15)  |               |            |               |            |

Symmetry transformations used to generate equivalent atoms:

#1  $x, -y+1/2, z$  #2  $x-1/2, -y+1/2, -z+3/2$  #3  $x-1/2, y, -z+3/2$

#4  $x+1/2, -y+1/2, -z+3/2$  #5  $-x+1, -y, -z+1$

---

<sup>i</sup>Bruker (2009) SAINT. Bruker AXS Inc., Madison, Wisconsin, USA.

<sup>ii</sup>Bruker (2009) SHELXTL. Bruker AXS Inc., Madison, Wisconsin, USA.

<sup>iii</sup>Sheldrick, G.M. (2007) SADABS. University of Gottingen, Germany.

<sup>iv</sup>Sheldrick, G.M. (2008) Acta Cryst. A64,112-122.

<sup>v</sup>Sheldrick, G.M. (2008) Acta Cryst. A64,112-122.

<sup>vi</sup> $R1 = \frac{\sum ||F_o| - |F_c||}{\sum |F_o|}$

$wR2 = [\frac{\sum w(F_o^2 - F_c^2)^2}{\sum w(F_o^2)^2}]^{1/2}$

$GOF = [\frac{\sum w(F_o^2 - F_c^2)^2}{(n - p)}]^{1/2}$

where n = the number of reflections and p = the number of parameters refined.

<sup>vii</sup>“ORTEP-II: A Fortran Thermal Ellipsoid Plot Program for Crystal Structure Illustrations”. C.K. Johnson (1976) ORNL-5138.
